# Supplementary material for: Inhibition of Hedgehog-Signaling Driven Genes in Prostate Cancer Cells by Sutherlandia frutescens Extract
Source: PubMed Central journal article supplement (PMC4694108; doi:10.1371/journal.pone.0145507), 2015-12-28
Supplement: pone.0145507.s001.pdf [file pone.0145507.s001.pdf]

## Supporting information file S1 Figure

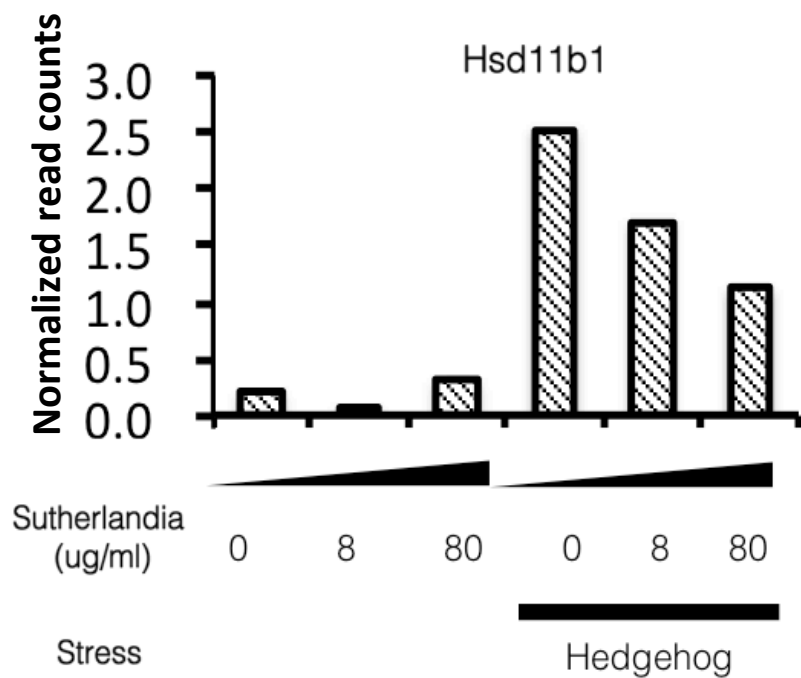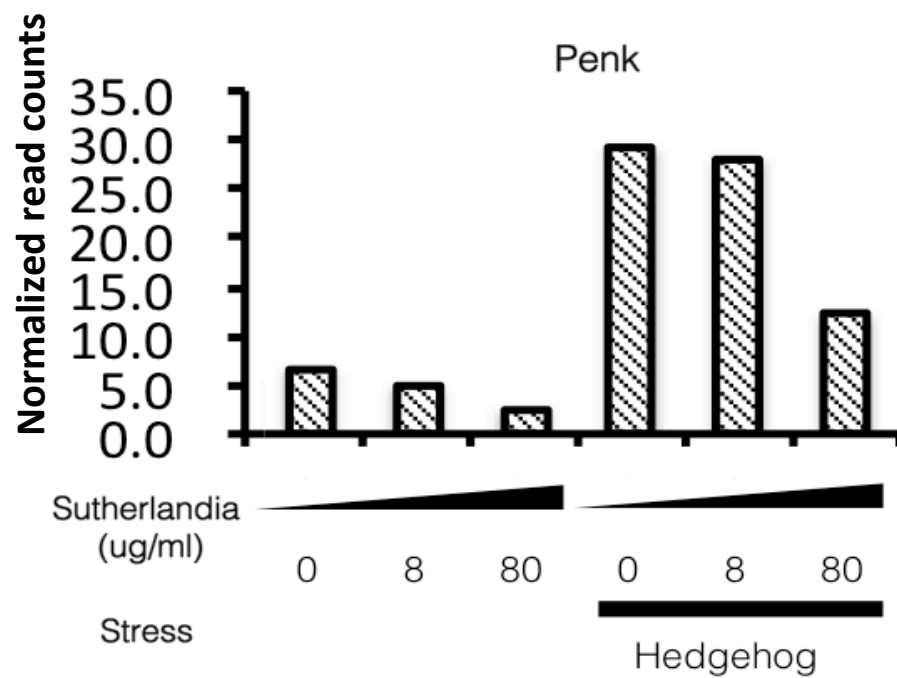

**RNA-seq reads of Hsd11b1 and Penk** Transcripts concentrations of (a) *hsd11b1*, (b) *penk* (c) *gli1* and (d) *ptch1* are represented by normalized deep sequencing reads, in the form of counts-per-million-reads (cpm). The cpm values are shown for the conditions with or without Hedgehog ligand.
